# Supplementary material
Source: PubMed Central journal article supplement (PMC8376415)
Supplement: PRO-30-1818-s001.pdf [file PRO-30-1818-s001.pdf]

# Supplementary Information

## NF- $\kappa$ B Rel Subunit Exchange on a Physiological Timescale

Matthew Biancalana<sup>1,2</sup>, Eviatar Natan<sup>3</sup>, Michael J. Lenardo<sup>2\*</sup>, Alan R. Fersht<sup>1\*</sup>

<sup>1</sup>Medical Research Council Laboratory of Molecular Biology, Cambridge Biomedical Campus, Cambridge CB2 0QH, UK

<sup>2</sup>Molecular Development of the Immune System Section, Laboratory of Immune System Biology, National Institute of Allergy and Infectious Diseases, National Institutes of Health, Bethesda, MD 20892, USA

<sup>3</sup>Department of Chemistry, University of Oxford, Oxford OX1 3TA, UK

\*co-last authors and co-supervisors

**Keywords:** DNA binding, native mass spectrometry, NF-kappaB, NF- $\kappa$ B, protein complex, protein dynamics, protein-protein interaction, Rel proteins, subunit exchange, transcription factor

**Abbreviations:** DSF; differential scanning fluorimetry, ESI; electrospray ionisation, GuHCl; guanidinium hydrochloride, Ig; immunoglobulin, IKK; Inhibitory  $\kappa$ B Kinase, MALS; multi-angle light scattering, MS; mass spectrometry, NLS; nuclear localisation signal, RHD; Rel homology domain, SDS-PAGE; sodium dodecyl sulphate polyacrylamide gel electrophoresis, SEC; size-exclusion chromatography

### Running title:

NF- $\kappa$ B Rel Subunit Exchange

NF- $\kappa$ B Rel Subunit Exchange on a Physiological Timescale

### Statement of Significance:

Many of the fundamental biological processes across all organisms are directed by the expression of genes. Genes are, in turn, regulated by transcription factors that can either activate or silence regions of DNA. Here, we describe the interactions of a set of transcription factors that form a critical component in the genetic regulation of the immune system using a robust soluble expression system. The proteins p50 and p65 form both homodimers (p50/p50 and p65/p65) and heterodimers (p50/p65) that determine the DNA sequences these transcription factors bind to, as well as which genes they activate. We have defined the preferential association of p50 and p65 using a precision technique called “MS-MS.” These results shed further biophysical insight into how association of these proteins regulates gene transcription and protein expression.

Supplementary Figure 1. Comparison of human and mouse p50 RHD (residues 1-420).

```

P50_HUMAN MAEDDPYLGRPEQMFHLDPSLTHTFNPEVFQPMALPTDGPYLQILEQPKQRGFRFRYV 60
P50_MOUSE MADDDPYG--TGQMFHLNLTALHHSIFNAELYSPEIPLSTDGPYLQILEQPKQRGFRFRYV 58
      **:****      *****: :***:*** *::.:.*: * *****

P50_HUMAN CEGPSHGGLPGASSEKNKKSYPQVKICNYVGPAAKVIIVQLVTNGKNIHLHAHSLVGKHCED 120
P50_MOUSE CEGPSHGGLPGASSEKNKKSYPQVKICNYVGPAAKVIIVQLVTNGKNIHLHAHSLVGKHCED 118
      *****

P50_HUMAN GICTVTAGPKDMVVGAFANLILHVTKKKVFETLEARMTEACIRGYNPGLLVHVDLAYLQA 180
P50_MOUSE GVCTVTAGPKDMVVGAFANLILHVTKKKVFETLEARMTEACIRGYNPGLLVHSDLAYLQA 178
      *:*****

P50_HUMAN EGGGDRQLGDREKELIRQAALQQTKEMDLSVRLMFTAFLPDSTGSFTRRLEPVVSDAIY 240
P50_MOUSE EGGGDRQLTDREKEIIRQAAVQQTKEMDLSVRLMFTAFLPDSTGSFTRRLEPVVSDAIY 238
      ***** *****:*****:*****

P50_HUMAN DSKAPNASNLKIVRMDRTAGCVTGEEIYLLCDKVQKDDIQIRFYEEEEENGWEGFGDF 300
P50_MOUSE DSKAPNASNLKIVRMDRTAGCVTGEEIYLLCDKVQKDDIQIRFYEEEEENGWEGFGDF 298
      *****

P50_HUMAN SPTDVHRQFAIVFKTPKYKDINITKPASVVFVQLRRKSDLETSEPKPFLYYPEIKDKEEVQ 360
P50_MOUSE SPTDVHRQFAIVFKTPKYKDVNITKPASVVFVQLRRKSDLETSEPKPFLYYPEIKDKEEVQ 358
      *****:*****:*****

P50_HUMAN RKRQKLMNPFSDSFGGGSGAGAGGGGMFGSGGGGGTGSTGPGYSFPHYGFPTYGGITFH 420 . . .
P50_MOUSE RKRQKLMNPFSDSFGGGSGAGAGGGGMFGSGGGGGTGSPGPGYYSNYGFPPYGGITFH 418 . . .
      *****:*****:*****

```

Supplementary Figure 2. Comparison of human and mouse p65 RHD (residues 1-360).

```

P65_HUMAN MDELFPFLIFPAEPAQASGPYVEIIEQPKQRGMFRYKCEGRSAGSIPGERSTDTTKTHPT 60
P65_MOUSE MDDLFPFLIFPSEPAQASGPYVEIIEQPKQRGMFRYKCEGRSAGSIPGERSTDTTKTHPT 60
      **:*****:*****

P65_HUMAN IKINGYTGPGTVRISLVTKDPPHRPHHELVGKDCRDGFYEAELCPDRCIHSFQNLGIQC 120
P65_MOUSE IKINGYTGPGTVRISLVTKDPPHRPHHELVGKDCRDGYEADLCPDRSIHSFQNLGIQC 120
      *****:***:*****

P65_HUMAN VKKRDLEQAISQRIQTNNNPFQVPIEEQRGDYDLNAVRLCFQVTVRDPGRPLRLPPVLS 180
P65_MOUSE VKKRDLEQAISQRIQTNNNPFHVPIEEQRGDYDLNAVRLCFQVTVRDPAGRPLLLTPVLS 180
      *****:*****:*****

P65_HUMAN HPIFDNRAPNTAELKICRVNRNSGSLGGDEIFLLCDKVQKEDIIEVYFTGPGWEARGSFS 240
P65_MOUSE HPIFDNRAPNTAELKICRVNRNSGSLGGDEIFLLCDKVQKEDIIEVYFTGPGWEARGSFS 240
      *****

P65_HUMAN QADVHRQVAIVFRTPPYADPSLQAPVRVSMQLRRPSDRELEPMFQYLPDTPDRHRIE 300
P65_MOUSE QADVHRQVAIVFRTPPYADPSLQAPVRVSMQLRRPSDRELEPMFQYLPDTPDRHRIE 300
      *****

P65_HUMAN KRKRTYETFKSIMKSPFSGPTDPRPPRRIAVPSRSSASVPKPAPQYPFTSSLSTINY 360 . . .
P65_MOUSE KRKRTYETFKSIMKSPFNGPTEPRPPRRIAVPTRNSTSVPKPAPQYTFPASLSTINF 360 . . .
      *****:***:*** *****:*.*:***** * :*****:

```

Supplementary Figure 3. Comparison of human p65 RHD (residues 1-359) and p50 RHD (residues 1-410).

```

P65_HUMAN -----MDELFP--IFPAEPAQASGPYVEIIEQPKQRGMFRYK 37
P50_HUMAN MAEDDPYLGRPEQMFHLDPSLTHTFINPEVVFQPMALPTDGPYLQILEQPKQRGFRFRYV 60
          : * : * : .***:.*:*****:***

P65_HUMAN CEGRSAGSIPGERSTDTTKTHPTIKINGYTGPGTVRISLVTKDPPHRPHPHLVGKDCRD 97
P50_HUMAN CEGPESHGGLPGASSEKNKSYQVKICNYVGPQAKVIVQLVTNGKNIHLHAHSLVGHKCED 120
          *** * *.*** * ..*:* :** *.***.* :***. : * *.***.***

P65_HUMAN GFYEALCPDRCIHSFQNLGIQCVKKRDLEQAISQRIQTNN----N----- 139
P50_HUMAN GICTVTAGPKDMVVGAFANLGLHVTKKKVFETLEARMTEACIRGYNPGLLVHPDLAYLQA 180
          *: . * . : .* **** *.**.: :.:. *: *

P65_HUMAN -----PFQVPIEEQRGDYDLNAVRLCFQVTVRDPVSGR--PLRLPPVLSHPIF 184
P50_HUMAN EGGGDRQLGDREKELIRQAALQQTKEMDLSVRLMFTAFLPDSTGSFTRRLEPVVSDAIY 240
          :: :* : **..*** * . : * :* ** **:*.*

P65_HUMAN DNRAPNTAELKICRVNRNSGSLGGDEIFLLCDKVQKEDIEVYF-----TGPGEARGSF 239
P50_HUMAN DSKAPNASNLKIVRMDRTAGCVTGEEIYLLCDKVQKDDIQIRFYEEEENGWVWEGFGDF 300
          *..***:.*** *:*.*.* **:*:*****:***: * . * *.*.*

P65_HUMAN SQADVHRQVAIVFRTPPYADPSIQAPVRVSMQLRRPSDRELSEPMFQYLPDTPDRHRRIE 299
P50_HUMAN SPTDVHRQFAIVFKTPKYKDINITKPASVVFVQLRRKSDLETSEPKPFLYYPEIKDKEEVQ 360
          * :*****.***:* * * .: *. * :**** * * * * * * * * :.*:..:

P65_HUMAN EKRRKRTYETFKSIKKKSPFSGPTDPRPPRRRIAVPSRSSASVPKPAPQYPFTSSLSTIN 359 . . .
P50_HUMAN RKRQKLMNPFSDSFGGSGAGAGG-----GMFGSGGGGGT--GSTGPGYSF----PHYG 410 . . .
          .**:* .*. . : . :* . : . . . . : * * .
    
```

## p50-1/p50-1 + p50-2/p50-2

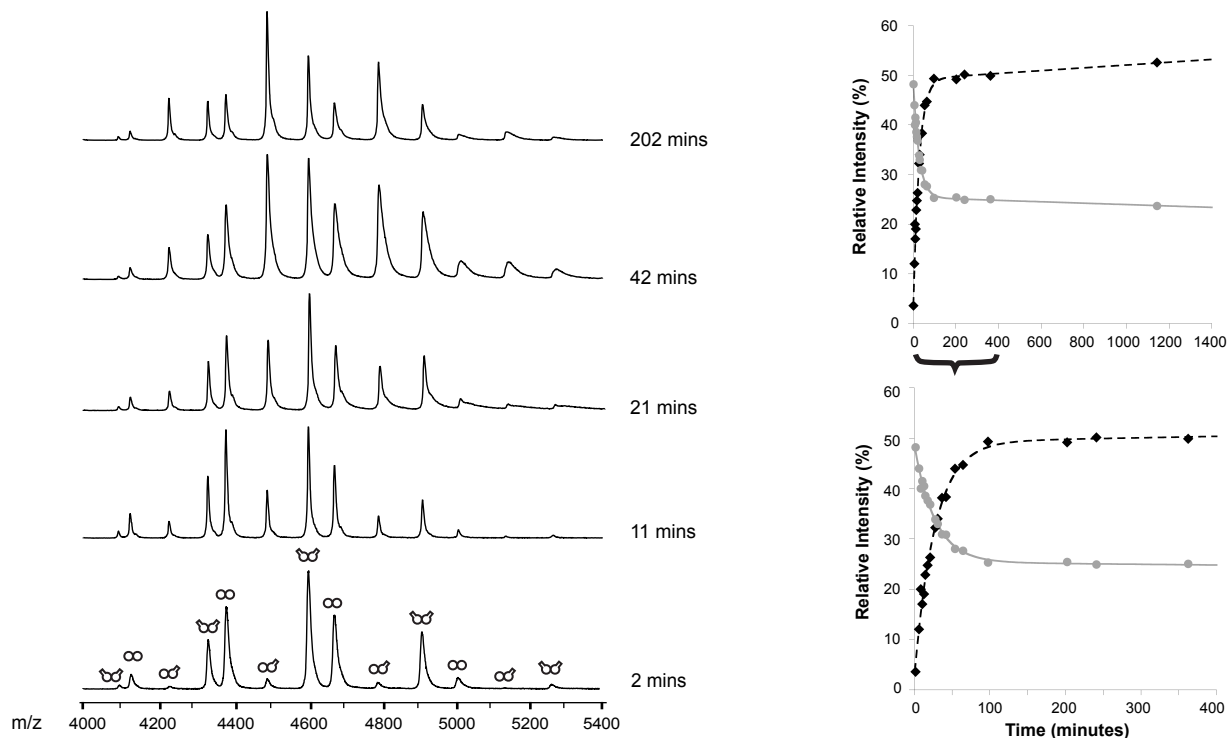

$$t_{1/2} = 18 \text{ mins}$$

### Supplementary Figure 4

#### Subunit exchange between p50 RHD dimers at room temperature.

Native MS (ESI-MS) time-course of subunit exchange between p50-1/p50-1 (white circles) and p50-2/p50-2 (white circles with tails) RHD dimers. The upper right panel shows the relative populations of each species from 0-1400 minutes. Note that values obtained for the homodimeric species have been averaged to generate the decay curve. The lower right panel shows the data corresponding to the region bracketed above, showing the relative populations of each species from 0-400 minutes.

## p65-1/p65-1 + p65-2/p65-2

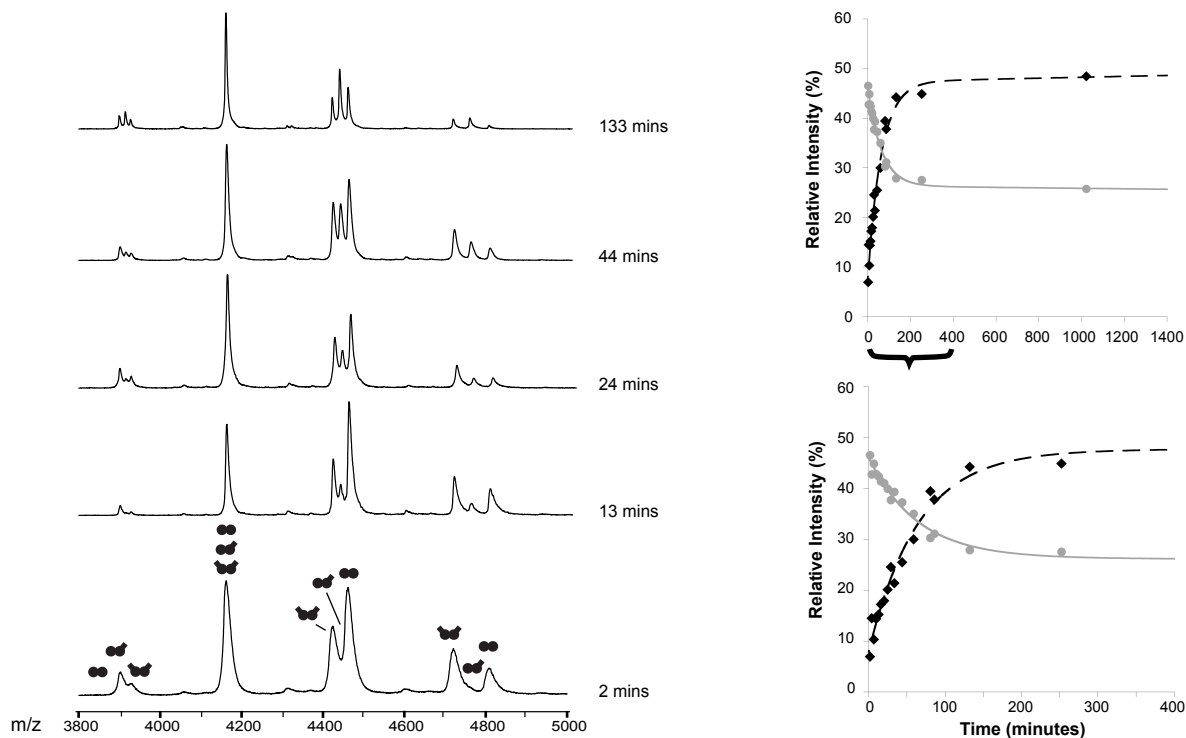

$$t_{1/2} = 44 \text{ mins}$$

### Supplementary Figure 5

#### Subunit exchange between p65/p65 RHD dimers at room temperature.

Native MS (ESI-MS) time-course of subunit exchange between p65-1/p65-1 (black circles) and p65-2/p65-2 (black circles with tails) RHD dimers. The upper right panel shows the relative populations of each species from 0-1400 minutes. Note that values obtained for the homodimeric species have been averaged to generate the decay curve. The lower right panel shows the data corresponding to the region bracketed above, showing the relative populations of each species from 0-400 minutes.

## p50-1/p50-1 + p65-1/p65-1

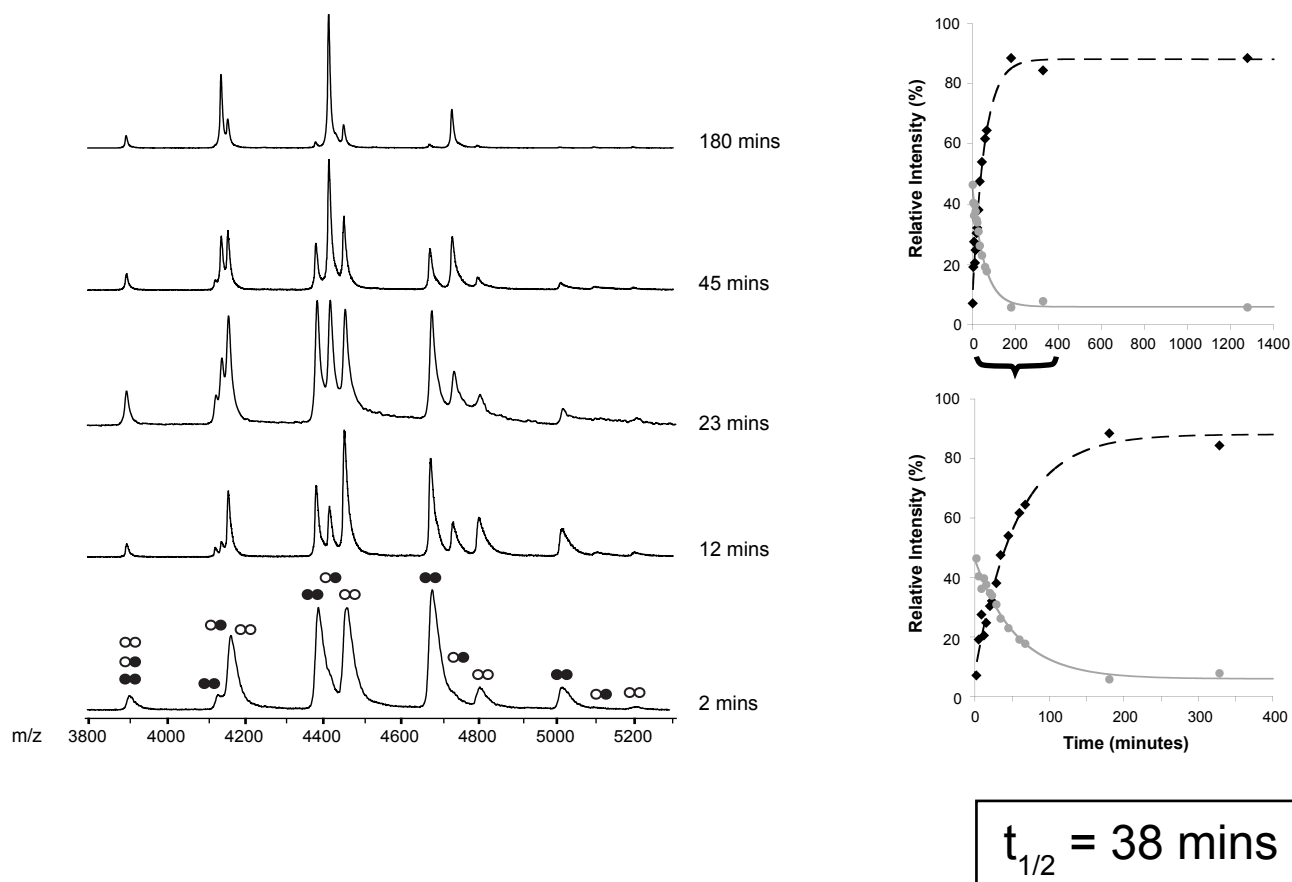

### Supplementary Figure 6

#### Subunit exchange between p50/p65 RHD dimers at room temperature.

Native MS (ESI-MS) time-course of subunit exchange between p50-1/p50-1 (white circles) and p65-1/p65-1 (black circles) RHD dimers. The upper right panel shows the relative populations of each species from 0-1400 minutes. Note that values obtained for the homodimeric species have been averaged to generate the decay curve. The lower right panel shows the data corresponding to the region bracketed above, showing the relative populations of each species from 0-400 minutes.

## p50-1/p65-1 + p50-2/p65-2

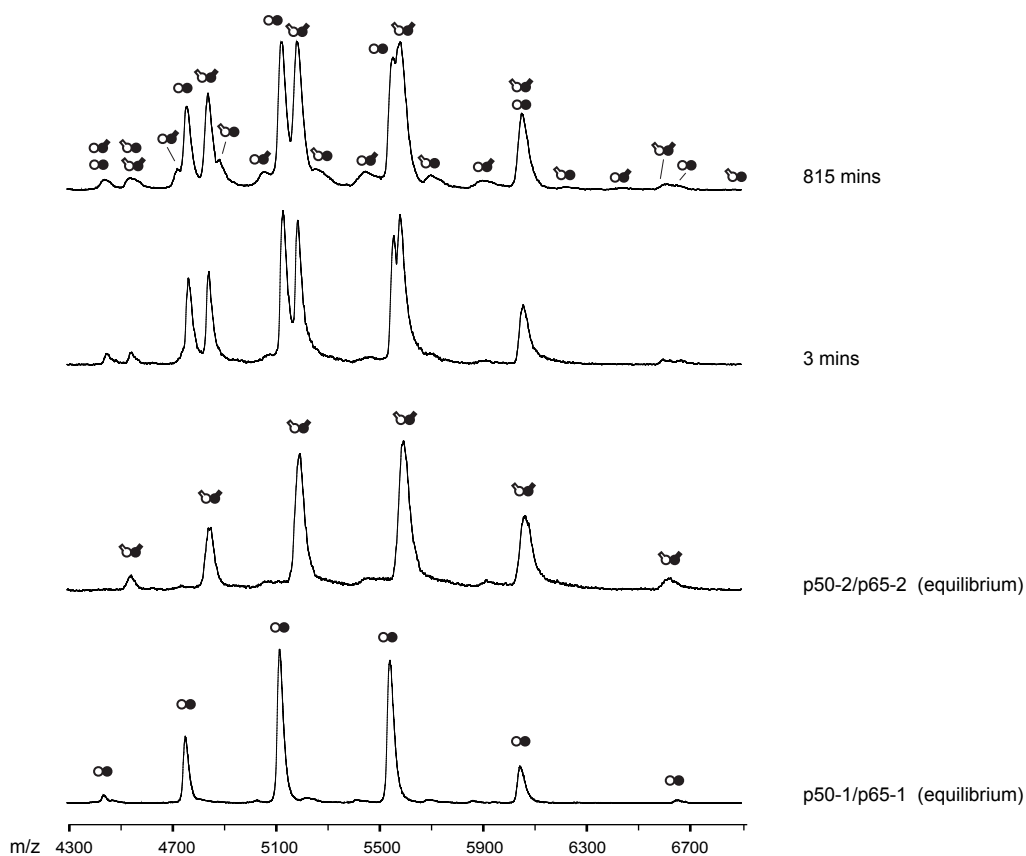

### Supplementary Figure 7

#### Subunit exchange between p50-1/p65-1 and p50-2/p65-2 RHD dimers at room temperature.

Native MS (ESI-MS) time-course of subunit exchange between p50-1/p65-1 (white and black circles) and p50-2/p65-2 (white circles with tails and black circles with tails) RHD dimers. These data demonstrate the remarkable kinetic stability of the p50/p65 RHD heterodimers at RT. Only negligible subunit exchange is observed over the course of the experiment (exceeding 800 seconds).

Supplementary Table 1. DSF thermal melts conducted on p50 RHD.

|                                    | 50 mM NaCl<br>(°C) | 150 mM NaCl<br>(°C) |
|------------------------------------|--------------------|---------------------|
| <b>Protein alone</b>               | 48.2 +/- 0.4       | 48.6 +/- 0.4        |
| <b>Heparin</b>                     | 53.0 +/- 0.3       | 52.9 +/- 0.4        |
| <b>κB_20mer ds oligo</b>           | 58.6 +/- 0.3       | 52.4 +/- 0.2        |
| <b>κB_20mer ss oligo</b>           | 48.7 +/- 0.4       | 49.2 +/- 0.4        |
| <b>non-specific 20mer ds oligo</b> | 50.6 +/- 0.4       | 49.4 +/- 0.3        |

Supplementary Table 2. DSF thermal melts conducted on p65 RHD.

|                                    | 50 mM NaCl<br>(°C) | 150 mM NaCl<br>(°C) |
|------------------------------------|--------------------|---------------------|
| <b>Protein alone</b>               | 51.2 +/- 0.3       | 50.8 +/- 0.4        |
| <b>Heparin</b>                     | 55.9 +/- 0.2       | 56.5 +/- 0.4        |
| <b>κB_20mer ds oligo</b>           | 61.5 +/- 0.4       | 55.5 +/- 0.3        |
| <b>κB_20mer ss oligo</b>           | 55.8 +/- 0.4       | 50.8 +/- 0.3        |
| <b>non-specific 20mer ds oligo</b> | 52.6 +/- 0.4       | 52.4 +/- 0.3        |
